1 **Title**

2 Metabolite profiling of experimental cutaneous leishmaniasis lesions demonstrates significant  
3 perturbations in tissue phospholipids

4 **Short Title**

5 Metabolism of infection in cutaneous leishmaniasis skin lesions

6 **Authors and Affiliations**

7 Adwaita R. Parab<sup>1,2</sup>, Diane Thomas<sup>3</sup>, Sharon Lostracco-Johnson<sup>3</sup>, Jair Lage de Siqueira-Neto<sup>3</sup>,  
8 James McKerrow<sup>3</sup>, Pieter C. Dorrestein<sup>3,4,5</sup>, Laura-Isobel McCall<sup>1,2,6\*</sup>

9  
10 <sup>1</sup>Department of Microbiology and Plant Biology, University of Oklahoma, Norman, Oklahoma,  
11 United States of America.

12 <sup>2</sup>Laboratories of Molecular Anthropology and Microbiome Research, University of Oklahoma,  
13 Norman, Oklahoma, United States of America.

14 <sup>3</sup>Skaggs School of Pharmacy and Pharmaceutical Sciences, University of California San Diego,  
15 La Jolla, California, United States of America.

16 <sup>4</sup>Center for Microbiome Innovation, University of California San Diego, La Jolla, California,  
17 United States of America.

18 <sup>5</sup>Collaborative Mass Spectrometry Innovation Center, University of California San Diego, La  
19 Jolla, California, United States of America.

20 <sup>6</sup>Department of Chemistry and Biochemistry, University of Oklahoma, Norman, Oklahoma,  
21 United States of America.

22

23 \*Corresponding author

24 E-mail: [lmccall@ou.edu](mailto:lmccall@ou.edu) (LIM)

25

## 26 **Abstract**

27           Each year 700,000 to 1.2 million new cases of cutaneous leishmaniasis (CL) are reported  
28 and yet CL remains one of thirteen diseases classified as neglected tropical diseases (NTDs).  
29 *Leishmania major* is one of several different species of that same genus that can cause CL.  
30 Current CL treatments are limited by adverse effects and rising resistance. Studying disease  
31 metabolism at the site of infection can lead to new drug targets. In this study, samples were  
32 collected from mice infected in the ear and footpad with *L. major* and analyzed by untargeted  
33 liquid chromatography-tandem mass spectrometry (LC-MS/MS). Significant differences in  
34 overall metabolite profiles were noted in the ear at the site of the lesion. Interestingly, lesion-  
35 adjacent, macroscopically healthy sites also showed alterations in specific metabolites, including  
36 select phosphocholines (PCs). Host-derived PCs in the lower *m/z* range (*m/z* 200-799) showed an  
37 increase with infection in the ear at the lesion site, while those in the higher *m/z* range (*m/z* 800-  
38 899) were decreased with infection at the lesion site. Overall, our results expanded our  
39 understanding of the mechanisms of CL pathogenesis through the host metabolism and may lead  
40 to new curative measures against infection with *Leishmania*.

## 41 **Author summary**

42           Cutaneous leishmaniasis (CL) is one of thirteen neglected tropical diseases in the world  
43 today. It is an infectious disease with a wide distribution spanning five continents, with  
44 increasing distribution expected due to climate change. CL manifests as skin lesions and ulcers  
45 that are disabling and stigmatized. With the current treatment options being limited, studying  
46 host-pathogen metabolism can uncover mechanisms of disease pathogenesis that may lead to  
47 new curative measures against infection. In this paper we used untargeted metabolomics to  
48 address molecular-level changes occurring *in vivo* in experimental skin lesions of *Leishmania*

49 *major*. Distinct global metabolic profiles were observed. Total phosphocholines (PCs) and those  
50 in the lower  $m/z$  ranges were significantly higher at the site of the skin lesion in the ear. In  
51 addition, specific PCs as well as PCs of varied  $m/z$  ranges were also affected at healthy-  
52 appearing lesion-adjacent sites, indicating that infection-induced metabolic perturbations are not  
53 restricted to the lesion site. Ultimately, these results provide essential clues to the metabolic  
54 pathways affected by CL.

## 55 **Introduction**

56 Leishmaniasis affects people in 88 countries worldwide in tropical, subtropical and  
57 temperate regions, putting approximately 350 million individuals at risk of infection, with  
58 approximately 12 million battling the disease [1]. It is one of the three most impactful vector-  
59 borne protozoan neglected tropical diseases, causing approximately 2.1 million DALYs  
60 (Disability-Adjusted Life Years) and 51,000 deaths. With recent population movements,  
61 leishmaniasis is now affecting people in non-endemic regions as well. The expanding spread of  
62 leishmaniasis can be attributed to climate change and social constraints of populations living in  
63 poverty and conflict. Leishmaniasis is a disease that is exacerbated by poverty and socio-  
64 economic barriers, increasing rates of disease progression, mortality and morbidity [2]. It comes  
65 at the high cost of treatment with the consequences of low or no income due to social stigmas  
66 associated with the symptoms of skin lesions, ulcers and disfigurement. Ultimately it puts  
67 financial burdens on individuals as well as societies as a whole [3].

68 Leishmaniasis is caused by about 20 different species of the parasite *Leishmania*, with  
69 three clinical syndromes: visceral, cutaneous (CL) and mucocutaneous leishmaniasis. CL is the  
70 most common form of the disease and symptoms include skin lesions and ulcers on exposed  
71 parts of the body. Mucocutaneous leishmaniasis is a disabling form in which the lesions can lead

72 to destruction of soft tissue of the nose, mouth and throat cavities. Of the three clinical forms of  
73 the disease, visceral leishmaniasis (kala-azar) is the most deadly, with serious symptoms like  
74 swelling of the liver and spleen, extreme anemia and frequent bouts of fever. Infection is  
75 transmitted through female sand-flies of the *Phlebotomus* genus in the Old World and *Lutzomyia*  
76 genus in the New World [4]. Promastigotes enter the body upon being bitten by a female sandfly.  
77 They are taken up by macrophages, where they enter the amastigote stage, multiplying and  
78 affecting various tissue types depending on whether infection is initiated by a viscerotropic or  
79 dermatropic parasite strain [5][6]. This initiates the clinical manifestations of the disease.  
80 Humans as well as other mammals serve as host reservoirs for the parasite [7].

81 The current course of treatment for CL is usually antimonial drug compounds. These are  
82 known to be highly toxic compounds, in addition to the threat of increased parasite-resistance to  
83 antimony in several regions of the world. Miltefosine, amphotericin B and paromomycin are  
84 among the other drugs that are administered for CL treatment, all of which have the drawbacks  
85 of high level of toxicity, increased drug resistance and treatment failure. Miltefosine is also  
86 teratogenic and should not be given to women in childbearing age. Treatment failure can be  
87 attributed to the characteristics of the host (immune system and nutritional status), of the parasite  
88 (mechanisms of survival within the host, drug resistance mechanisms, tissue location, etc.) and  
89 environmental factors such as awareness and treatment accessibility [8]. Approaching disease  
90 pathogenesis from a molecular perspective could uncover new mechanisms of infection and aid  
91 in developing new cures for leishmaniasis [9].

92 Alongside genes and proteins, metabolites play an important role in the life of an  
93 organism. The metabolome reflects the true functional endpoint of a complex biological system  
94 and provides a functional view of the organism by taking into account the sum of its genes,

95 RNA, proteins and its environment [10]. Untargeted metabolomics can help identify metabolites  
96 involved in disease pathogenesis, in an unbiased fashion, acquiring data across a broad mass  
97 range [11]. For example, untargeted metabolomics has shown that miltefosine's mode of action  
98 may be related to modulation of parasite lipid metabolism, particularly increased levels of by-  
99 products of lipid turnover [12]. The overall aim of this work was to perform an untargeted  
100 metabolic analysis of CL lesions in mice infected with *Leishmania major*. Our results showed  
101 significant changes in the host metabolism, specifically the PC pathway, in the skin lesions of  
102 CL.

## 103 **Methods**

### 104 **Ethics statement**

105 All vertebrate animal studies were performed in accordance with the USDA Animal  
106 Welfare Act and the Guide for the Care and Use of Laboratory Animals of the National Institutes  
107 of Health. Euthanasia was performed by isoflurane overdose followed by cervical dislocation,  
108 under a protocol approved by the University of California San Diego Institutional Animal Care  
109 and Use Committee (protocol S14187).

### 110 ***In vivo* experimentation**

111 Female BALB/c mice (6-8 week-old) were injected intradermally in the left ear with  
112  $1 \times 10^6$  luciferase-expressing *L. major* strain LV39 promastigotes or in the left rear footpad with  
113  $5 \times 10^6$  luciferase-expressing *L. major* strain LV39 promastigotes in PBS [13]. Infected and  
114 uninfected ear tissue were collected 8 weeks post-infection and infected and uninfected footpads  
115 were collected 7 weeks post-infection, and immediately snap-frozen. Samples were stored at -  
116  $80^\circ\text{C}$  until metabolite extraction. Parasites were maintained at  $28^\circ\text{C}$  in M199 medium (Sigma)  
117 supplemented with 10% fetal bovine serum (Sigma), 1% penicillin-streptomycin, RPMI 1640

118 vitamin mix (1%), HEPES (25 mM), adenosine (100  $\mu$ M), glutamine (1 mM), hemin (0.005%),  
119  $\text{NaHCO}_3$  (12 mM) and folic acid (10  $\mu$ M) (pH 7.2) [14].

## 120 LC-MS/MS

121 Metabolite extraction, liquid chromatography and mass spectrometry were performed as  
122 previously described [15]. Briefly, metabolites were extracted with 50% methanol (aqueous  
123 extract) followed by 3:1 dichloromethane:methanol (organic extract). LC was performed on an  
124 UltiMate 3000 UHPLC (Thermo Scientific) with Phenomenex UHPLC 1.7  $\mu$ m 100 Å Kinetex  
125 C8 column (50 X 2.1 mm), and with water and 0.1% formic acid as mobile phase A and  
126 acetonitrile and 0.1% formic acid as mobile phase B, flow rate of 0.5 mL/min and column  
127 temperature of 40°C. Daily MS calibration was performed with ESI-L Low Concentration  
128 Tuning Mix (Agilent Technologies). The internal calibrant was Hexakis(1H,1H,3H-  
129 tetrafluoropropoxy)phosphazene (Synquest Laboratories),  $m/z$  922.009798 which was present  
130 throughout the run. MS/MS data for each run was collected by fragmentation of the ten most  
131 intense ions, in range 80-2,000  $m/z$ , with active exclusion after 4 spectra and release after 30s.  
132 LC gradients and MS parameters for each extraction were as follows (Table 1 and Table 2).

**Table 1. LC Gradients.**

| Ear aqueous extraction |       |
|------------------------|-------|
| Start                  | 2% B  |
| 1 min                  | 2% B  |
| 1.5 min                | 40% B |

|                                   |       |
|-----------------------------------|-------|
| 4 min                             | 98% B |
| 5 min                             | 98% B |
| 6 min                             | 2% B  |
| 7 min                             | 2% B  |
| <b>Ear organic extraction</b>     |       |
| Start                             | 2% B  |
| 1 min                             | 2% B  |
| 1.5 min                           | 60% B |
| 5.5 min                           | 98% B |
| 7.5 min                           | 98% B |
| 8.5 min                           | 2% B  |
| 10.5 min                          | 2% B  |
| <b>Footpad aqueous extraction</b> |       |
| Start                             | 2% B  |
| 1 min                             | 2% B  |
| 1.5 min                           | 40% B |
| 6 min                             | 98% B |
| 6.5 min                           | 98% B |

|                                   |       |
|-----------------------------------|-------|
| 7 min                             | 2% B  |
| <b>Footpad organic extraction</b> |       |
| Start                             | 2% B  |
| 1 min                             | 2% B  |
| 1.5 min                           | 70% B |
| 7 min                             | 98% B |
| 8 min                             | 98% B |
| 9 min                             | 2% B  |
| 10.5 min                          | 2% B  |

133

**Table 2. MS parameters.**

|                        |           |
|------------------------|-----------|
| Nebulizer gas pressure | 2 Bar     |
| Capillary voltage      | 4,500 V   |
| Ion source temperature | 200°C     |
| Dry gas flow           | 9.0 L/min |



|                          |             |
|--------------------------|-------------|
| Spectra rate acquisition | 3 spectra/s |
|--------------------------|-------------|

134

135 **LC-MS/MS Data analysis**

136 LC-MS/MS data was processed using MZmine 2.37 [16], with parameters as shown in

137 Table 3.

**Table 3. MZmine parameters**

| <b>Mass Detection</b>             |                                        |
|-----------------------------------|----------------------------------------|
| MS level 1: Noise level           | 1.00E+03                               |
| MS level 2: Noise level           | 10                                     |
| Mass detector                     | Centroid                               |
| <b>Chromatogram Builder</b>       |                                        |
| Min time span                     | 0.06 min                               |
| Min peak height                   | 3.00E+03                               |
| <i>m/z</i> tolerance              | 1e-6 or 10 ppm                         |
| <b>Chromatogram Deconvolution</b> |                                        |
| Algorithm                         | Baseline cutoff                        |
| Min peak height                   | 3.00E+03                               |
| Peak duration range (min)         | 0.06-2 min (ear), 0.01-7 min (footpad) |

|                                            |                                                               |
|--------------------------------------------|---------------------------------------------------------------|
| Baseline level                             | 1.00E+02 (ear), 1.50E+03 (footpad)                            |
| <i>m/z</i> range for MS2 scan pairing (Da) | 0.01                                                          |
| RT range for MS2 scan pairing (min)        | 0.2 min                                                       |
| <b>Isotopic Peaks Grouper</b>              |                                                               |
| <i>m/z</i> tolerance                       | 1e-6 or 10 ppm                                                |
| Retention time tolerance (absolute: min)   | 0.05 min                                                      |
| Monotonic shape                            | Enabled                                                       |
| Maximum charge                             | 3                                                             |
| Representative isotope                     | Most intense                                                  |
| <b>Join Aligner</b>                        |                                                               |
| <i>m/z</i> tolerance                       | 1e-6 or 10 ppm                                                |
| Weight for <i>m/z</i>                      | 7                                                             |
| Retention time tolerance (absolute: min)   | 0.5 min                                                       |
| Weight for RT                              | 3                                                             |
| <b>Manual Filtering</b>                    |                                                               |
| Min number of peaks per row                | 3                                                             |
| RT range                                   | 0.2-10.5 (ear organic and footpad),<br>0.2-6.9 (ear aqueous), |

|                                 |                    |
|---------------------------------|--------------------|
| MS2                             | required           |
| Manual validation of peak shape |                    |
| <b>Gap-filing</b>               |                    |
| <i>m/z</i> tolerance            | 0.000001 or 10 ppm |
| RT tolerance                    | 0.5 min            |
| Intensity tolerance             | 30%                |
| RT correction                   | Enabled            |

138

139 Total ion current (TIC) normalization and data processing was performed in Jupyter  
140 notebook with R [17]. Principal Coordinate Analysis (PCoA) was done using the Bray-Curtis-  
141 Faith dissimilarity matrix implemented in QIIME1 [18] and PERMANOVA calculations were  
142 performed using the R package “vegan” to compare the chemical similarity of samples from the  
143 four groups of varying condition and position of infection [19,20]. EMPERor was used to  
144 visualize PCoA plots [21]. randomForest package in R was used to find variables of importance  
145 associated with infection and sampling conditions, using 7000 trees [22]. Global Natural  
146 Products Social Molecular Networking platform (GNPS) was used to annotate molecules from  
147 spectral library references and to perform feature-based molecular networking [23][24][25]. The  
148 following parameters were used in GNPS: precursor ion mass tolerance of 0.02 Da, fragment ion  
149 mass tolerance of 0.02 Da, minimum cosine score of 0.7 and 4 or more matched fragment ions.  
150 The maximum shift allowed between two MS/MS spectra was 500 Da, 10 maximum neighbor  
151 nodes allowed and maximum difference between precursor ion mass of searched MS/MS

152 spectrum and library spectra was 100 Da. Spectral matches were evaluated by considering cosine  
153 scores, quality of mirror plots, as well as the number of matched peaks. Molecular network  
154 visualization was done in Cytoscape 3.7.2 [26]. Notched box plots showing metabolite feature  
155 abundance for the four different groups (infected/uninfected vs. center/edge) for the ear samples  
156 and two different groups (infected vs. uninfected) for the footpad samples along with non-  
157 parametric two-tailed Wilcoxon statistical tests were both performed in R. Boxplot whiskers  
158 represent the lowest and largest data points and non-overlapping boxplot notches indicate  
159 different medians between groups (95% confidence).

## 160 **Data Availability Statement**

161 Data has been deposited in MassIVE ([massive.ucsd.edu](http://massive.ucsd.edu), accession numbers  
162 MSV000081004 (ear) and MSV000080239 (footpad)). Molecular networking can be accessed  
163 here: <https://gnps.ucsd.edu/ProteoSAFe/status.jsp?task=451754c383de461e9e4abdf6eb3199d2>  
164 (aqueous ear extraction),  
165 <https://gnps.ucsd.edu/ProteoSAFe/status.jsp?task=0d092bbb213347c3bd7a19b9cae2bcf4>  
166 (organic ear extraction),  
167 <https://gnps.ucsd.edu/ProteoSAFe/status.jsp?task=becfa09afe7b4f83a7c5621029f2df24> (aqueous  
168 footpad extraction),  
169 <https://gnps.ucsd.edu/ProteoSAFe/status.jsp?task=fb6f32dcafe34ec587bb264341814217>  
170 (organic footpad extraction).

## 171 **Results**

172 To better understand the impact of infection on tissue metabolites, we analyzed overall  
173 and specific metabolite differences in the presence and absence of infection with *L. major*, at  
174 sites of lesion and lesion-adjacent sites (with no visible signs of infection). BALB/c mice were

175 injected intradermally in the ear. Eight weeks post-infection, samples were collected from the  
176 area where the parasites were injected, which showed skin lesions (“infected ear center”), the  
177 surrounding area that appeared infection-free (“infected ear edge”), and the matched tissue  
178 regions from the uninfected ear (“uninfected ear center”, “uninfected ear edge”) (Fig 1 A).  
179 Metabolites were extracted with aqueous and organic solvents and analyzed by untargeted LC-  
180 MS/MS (see Methods). Overall, for both aqueous and organic extractions, distinct global  
181 metabolite profiles were observed by Principal Coordinate Analysis (PCoA) for the infected ear  
182 center compared to infected ear edge (PERMANOVA  $p < 0.01$ , aqueous extraction  $R^2 = 0.743$ ,  
183 organic extraction  $R^2 = 0.643$ , Fig 1 B and 1 C), to uninfected ear center (PERMANOVA  $p < 0.01$ ,  
184 aqueous extraction  $R^2 = 0.739$ , organic extraction  $R^2 = 0.805$ , Fig 1 B and 1 C) and to uninfected  
185 ear edge (PERMANOVA  $p < 0.01$ , aqueous extraction  $R^2 = 0.288$ , organic extraction  $R^2 = 0.248$ ,  
186 Fig 1 B and 1 C). In contrast, no significant differences for both aqueous and organic extracts by  
187 PCoA analysis in terms of overall metabolite profile were observed between infected ear edge  
188 and uninfected ear samples (PERMANOVA  $p > 0.1$ , Fig 1 B and 1 C). Thus, *L. major* infection  
189 changes the overall tissue chemical composition at the lesion location in the ear. In contrast, the  
190 impact of *L. major* infection on overall footpad metabolite profile for the organic  
191 (PERMANOVA  $p = 0.218$   $R^2 = 0.156$ , S1 Fig) and aqueous (PERMANOVA  $p = 0.244$   $R^2 = 0.146$ ,  
192 S1 Fig) extractions was much more minor.

193

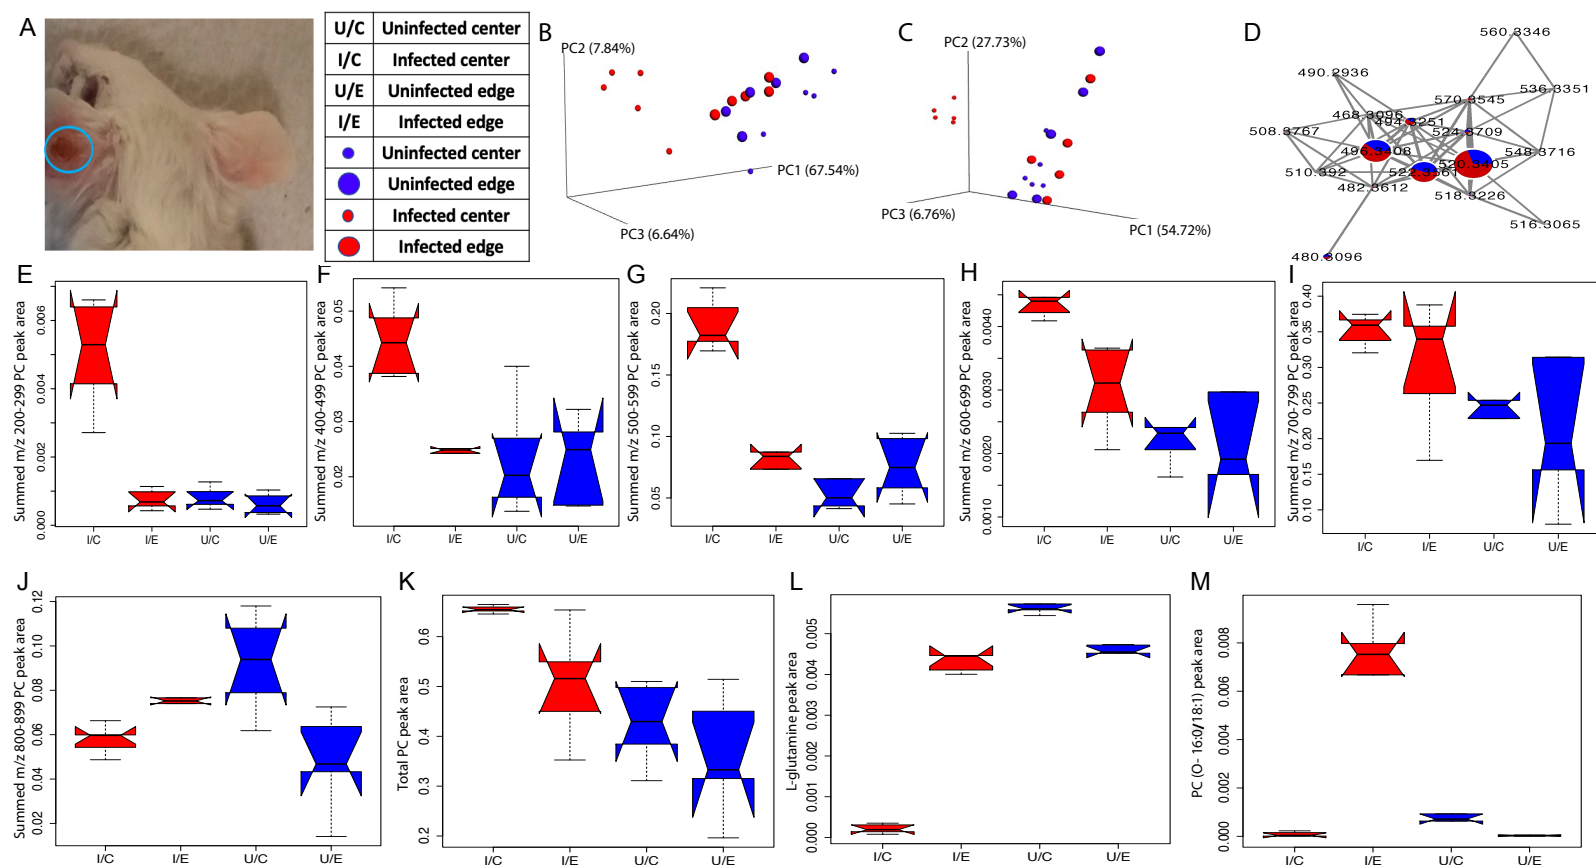

194 **Fig.1. Effect of *in vivo* *L. major* infection on host metabolite profile.** (A) Sites  
 195 of infection and sample collection. Lesion at the center of the infected ear is  
 196 circled in blue. (B) PCoA analysis of aqueous extraction from infected and  
 197 uninfected ear samples, showing overall differences in metabolite profiles  
 198 between sampling sites. PERMANOVA  $p=0.004$ ,  $R^2=0.288$ . (C) PCoA analysis  
 199 of organic extraction from infected and uninfected ears, showing differences in  
 200 global metabolite profiles between sampling sites. PERMANOVA  $p=0.003$ ,  
 201  $R^2=0.248$ . (D) Representative subnetwork of phosphocholine (PC) molecular  
 202 family members found in ear tissue and showing high relative abundance with  
 203 infection (red) and low abundance without infection (blue). (E-J) PCs in the  $m/z$

204 range 200-299, 400-499, 500-599, 600-699, 700-799 and 800-899, respectively,  
205 change with infection and sampling position in the ear. (K) Total PC levels were  
206 increased at the site of infection in the ear. Non-overlapping boxplot notches  
207 indicate significantly different medians between groups [27]. (L) Representative  
208 metabolite decreased by infection at the site of the lesion: glutamine (Wilcoxon  
209 rank-sum test comparing infected ear center vs infected ear edge  $p=0.007937$ ).  
210 (M) Representative metabolite increased only at infection-adjacent sites: 1-  
211 hexadecyl-2-(9Z-octadecenoyl)-sn-glycero-3-phosphocholine (PC(O-16:0/18:1),  
212 Wilcoxon rank-sum test comparing infected ear center vs infected ear edge  
213  $p=0.007937$ ).

214 Random forest machine learning analysis [22] was performed to identify the metabolites  
215 most affected by infection in both experimental systems, with annotation performed using  
216 molecular networking and GNPS [23]. Annotatable molecules most highly affected by infection  
217 include metabolites of the phosphocholine (PC) family of phospholipids, glutamine, and  
218 eicosatrienoic acid (Table 4, 5, 6, 7, S2 Fig). Glutamine was decreased with infection at the site  
219 of the ear lesion (Wilcoxon rank sum test  $p$  value= $0.0079$  compared to the uninfected ear center,  
220 Fig 1 L), although it was unaffected by infection in the footpad, and eicosatrienoic acid was  
221 increased in the infected footpad (Wilcoxon rank sum test  $p$  value= $0.0079$ ). Given that many of  
222 the differential molecules are PCs, we investigated the impact of infection on this family in  
223 greater detail. Molecular network analysis of PC family molecules in both aqueous and organic  
224 ear extracts showed that most detected PCs were strongly affected by infection (Fig 1 D, S3 Fig).  
225 In particular, total PCs and PCs in the lower ranges of  $m/z$  200-299, 400-499, 500-599, 600-699  
226 were significantly higher in the infected ear center compared to the infected ear edge, to

227 uninfected ear center, and to uninfected ear edge, as well as for all uninfected samples (both  
228 positions combined) vs all infected samples (both positions combined) (Wilcoxon rank sum test  
229  $p$  value $<0.05$  for each pairwise comparison, Fig 1 E, F, G, H, K). Given that all these PCs were  
230 detected in both infected and uninfected samples, albeit at differential abundances, they are host-  
231 derived rather than parasite-derived. No PCs were detected in the  $m/z$  300-399 range. PCs in the  
232 range of  $m/z$  700-799 showed a similar trend where the infected and uninfected sample groups  
233 were significantly different (Wilcoxon rank sum test  $p$  value $<0.05$ ). PCs in the range of  $m/z$  700-  
234 799 were significantly higher in the infected ear center compared to the uninfected ear edge and  
235 center (Wilcoxon rank sum test  $p$  value $<0.05$ , Fig 1 I), while the levels of PCs were comparable  
236 between infected ear center and edge (Wilcoxon rank sum test  $p$  value = 0.55, Fig 1 I). In the  $m/z$   
237 800-899 range the opposite trend was seen, where the uninfected ear samples were not  
238 significantly different from the infected ear (Wilcoxon sum rank test  $p$  value=0.9, Fig 1 J).  
239 However, PCs in the range  $m/z$  800-899 were significantly higher in the uninfected ear center  
240 than the infected ear center (Wilcoxon rank sum test  $p$  value $<0.05$ , Fig 1 J). In contrast, the  
241 footpad PCs aggregated into  $m/z$  ranges did not show significant differences between the infected  
242 and uninfected groups, although specific PCs were increased by infection in the footpad (Table  
243 6, 7). These results indicate that PCs are strongly affected by cutaneous *Leishmania* infection. In  
244 addition, our observation that specific PCs as well as PCs of varied  $m/z$  ranges are also affected  
245 at lesion-adjacent sites (“infected ear edge”) indicates that infection-induced metabolic  
246 perturbations are not restricted to the lesion site, revealing a better picture of what is happening  
247 to the host during the disease state and providing clues to the pathways involved.



**Table 4. Most differential metabolite features (as identified by random forest analysis) for ear aqueous extraction**

| <i>m/z</i> | RT   | Spectral match on GNPS / LIPID MAPS annotation | Mass difference | PPM error | Cosine score | Number of matched peaks | Impact of infection in the ear               | P value (infected ear center vs uninfected ear center) | P value (infected ear edge vs uninfected ear edge) | P values (infected ear vs uninfected ear) | Effect in Footpad (Aqueous extraction) | Effect in Footpad (Organic extraction)                        |
|------------|------|------------------------------------------------|-----------------|-----------|--------------|-------------------------|----------------------------------------------|--------------------------------------------------------|----------------------------------------------------|-------------------------------------------|----------------------------------------|---------------------------------------------------------------|
| 794.6051   | 4.42 | PC family member; LipidMAPS: PC(O-38:5)        | NA              | NA        | NA           | NA                      | increased in infected ear edge               | 0.056                                                  | 0.0079                                             | 0.48                                      | ND                                     | increased in infected footpad                                 |
| 772.6201   | 4.73 | PC family member                               | NA              | NA        | NA           | NA                      | increased in infected ear edge               | 0.016                                                  | 0.0079                                             | 0.39                                      | ND                                     | ND                                                            |
| 750.5435   | 5.06 | PC family member                               | NA              | NA        | NA           | NA                      | increased in infected ear center             | 0.0079                                                 | 0.0079                                             | 2.2E-05                                   | ND                                     | unaffected by infection                                       |
| 155.0498   | 0.85 | NA                                             | NA              | NA        | NA           | NA                      | increased in infected & uninfected ear edges | 0.0079                                                 | 0.22                                               | 0.68                                      | increased in infected footpads         | ND                                                            |
| 752.5585   | 5.07 | NA                                             | NA              | NA        | NA           | NA                      | increased in infected ear center             | 0.0079                                                 | 0.0079                                             | 1.1E-05                                   | ND                                     | increased in infected footpad (not statistically significant) |

|          |      |                                                            |       |    |      |    |                                  |        |        |         |                         |                                                               |
|----------|------|------------------------------------------------------------|-------|----|------|----|----------------------------------|--------|--------|---------|-------------------------|---------------------------------------------------------------|
| 744.5906 | 4.48 | PC family member                                           | NA    | NA | NA   | NA | increased in infected ear edge   | 0.0079 | 0.0079 | 0.052   | ND                      | increased in infected footpad (not statistically significant) |
| 746.6052 | 4.78 | 1-headecyl-2-(9Z-octadecenoyl)-sn-glycero-3-phosphocholine | 0     | 4  | 0.96 | 14 | increased in infected ear edge   | 0.032  | 0.0079 | 0.28    | ND                      | increased in infected footpad                                 |
| 796.6205 | 4.91 | PC family member                                           | NA    | NA | NA   | NA | increased in infected ear edge   | 0.15   | 0.0079 | 0.11    | ND                      | increased in infected footpad                                 |
| 147.0815 | 0.34 | glutamine                                                  | 0.005 | 31 | 0.87 | 4  | decreased in infected ear center | 0.0079 | 0.42   | 0.00073 | unaffected by infection | unaffected by infection                                       |
| 770.605  | 4.58 | PC family member                                           | NA    | NA | NA   | NA | increased in infected ear edge   | 0.31   | 0.0079 | 0.22    | ND                      | unaffected by infection                                       |
| 720.5887 | 4.7  | PC family member                                           | NA    | NA | NA   | NA | increased in infected ear edge   | 0.095  | 0.0079 | 0.28    | ND                      | increased in infected footpad                                 |
| 794.6052 | 6.13 | PC(O-38:5)                                                 | NA    | NA | NA   | NA | increased in infected ear center | 0.0079 | 0.0079 | 1.1E-05 | ND                      | increased in infected footpad                                 |
| 330.1314 | 6.4  | NA                                                         | NA    | NA | NA   | NA | increased in                     | 0.0079 | 0.0079 | 1.1E-05 | ND                      | ND                                                            |

|          |      |    |    |    |    |    |                                              |       |      |       |                         |                         |
|----------|------|----|----|----|----|----|----------------------------------------------|-------|------|-------|-------------------------|-------------------------|
|          |      |    |    |    |    |    | infected ear center                          |       |      |       |                         |                         |
| 169.0624 | 0.31 | NA | NA | NA | NA | NA | decreased in infected ear center             | 0.011 | 0.55 | 0.011 | unaffected by infection | unaffected by infection |
| 261.1474 | 0.47 | NA | NA | NA | NA | NA | increased in infected & uninfected ear edges | 0.095 | 0.31 | 0.31  | unaffected by infection | unaffected by infection |

248

NA: not applicable; ND: not detected

**Table 5. Most differential metabolite features (as identified by random forest analysis) for ear organic extraction**

| <i>m/z</i> | RT   | Spectral match on GNPS / LIPID MAPS annotation | Mass difference | PPM error | Cosine score | Number of matched peaks | Impact of infection in the ear     | P value (infected ear center vs uninfected ear center) | P value (infected ear edge vs uninfected ear edge) | P values (infected ear vs uninfected ear) | Effect in Footpad (Aqueous extraction) | Effect in Footpad (Organic extraction) |
|------------|------|------------------------------------------------|-----------------|-----------|--------------|-------------------------|------------------------------------|--------------------------------------------------------|----------------------------------------------------|-------------------------------------------|----------------------------------------|----------------------------------------|
| 768.5862   | 5.26 | PC family member                               | NA              | NA        | NA           | NA                      | increased in infected ear          | 0.0079                                                 | 0.0079                                             | 1.1E-05                                   | ND                                     | increased in infected footpad          |
| 792.5574   | 5.71 | docosaheae noyl PAF C-16                       | 0.01            | 8         | 0.86         | 7                       | increased in infected ear center   | 0.012                                                  | 0.69                                               | 0.026                                     | ND                                     | unaffected by infection                |
| 856.5826   | 5.87 | PC(42:9)                                       | NA              | NA        | NA           | NA                      | increased in uninfected ear center | 0.0079                                                 | 1                                                  | 0.11                                      | ND                                     | ND                                     |
| 856.5826   | 5.9  | PC(42:9)                                       | NA              | NA        | NA           | NA                      | increased in uninfected ear center | 0.0079                                                 | 0.84                                               | 0.075                                     | ND                                     | ND                                     |
| 813.6845   | 5.27 | N-tetracosenoyl-4-sphingeny                    | 0               | 1         | 0.96         | 6                       | increased in infected ear edge     | 0.016                                                  | 0.0079                                             | 0.91                                      | ND                                     | increased in infected footpad          |

|          |      |                                                           |      |    |      |    |                                               |        |      |       |    |                                 |
|----------|------|-----------------------------------------------------------|------|----|------|----|-----------------------------------------------|--------|------|-------|----|---------------------------------|
|          |      | 1-1-O-phosphorylcholine                                   |      |    |      |    |                                               |        |      |       |    |                                 |
| 790.5424 | 5.43 | PC family member                                          | NA   | NA | NA   | NA | increased in infected & uninfected ear center | 0.55   | 0.69 | 0.63  | ND | unaffected by infection         |
| 828.5516 | 5.44 | PC family member                                          | NA   | NA | NA   | NA | increased in uninfected ear center            | 0.0079 | 0.69 | 0.14  | ND | increased in uninfected footpad |
| 854.5676 | 5.36 | PC(42:10)                                                 | NA   | NA | NA   | NA | increased in infected & uninfected ear center | 0.056  | 0.22 | 0.22  | ND | unaffected by infection         |
| 806.5682 | 5.42 | 1-palmitoyl-2-docosaheptenoyl-sn-glycero-3-phosphocholine | 0.02 | 22 | 0.81 | 18 | increased in uninfected ear center            | 0.0079 | 1    | 0.089 | ND | ND                              |
| 834.5994 | 5.91 | PC family member                                          | NA   | NA | NA   | NA | increased in uninfected                       | 0.0079 | 0.55 | 0.35  | ND | unaffected by infection         |

|           |      |                  |    |    |     |    |                                   |        |       |         |                         |                         |
|-----------|------|------------------|----|----|-----|----|-----------------------------------|--------|-------|---------|-------------------------|-------------------------|
|           |      |                  |    |    |     |    | ed ear center                     |        |       |         |                         |                         |
| 1017.6873 | 3.04 | NA               | NA | NA | NA  | NA | increase d in infected ear center | 0.0079 | 0.15  | 0.0015  | ND                      | ND                      |
| 770.6019  | 5.7  | PC family member | NA | NA | NA  | NA | increase d in infected ear center | 0.0079 | 0.095 | 0.00013 | ND                      | ND                      |
| 744.5848  | 5.59 | PC family member | NA | NA | NA  | NA | increase d in infected ear center | 0.011  | 0.052 | 0.00033 | ND                      | unaffected by infection |
| 332.6611  | 2.29 | NA               | 0  | 4  | 0.8 | 4  | increase d in uninfected ear      | 0.0079 | 0.22  | 0.00032 | ND                      | ND                      |
| 377.2679  | 3.53 | NA               | NA | NA | NA  | NA | increase d in infected ear center | 0.0079 | 0.22  | 0.043   | unaffected by infection | ND                      |

250 NA: not applicable; ND: not detected

**Table 6. Most differential metabolite features (as identified by random forest analysis) for footpad aqueous extraction**

| <i>m/z</i> | RT   | Spectral match on GNPS / LIPID MAPS annotation  | Mass difference | PPM error | Cosine score | Number of matched peaks | Impact of infection             | P values |
|------------|------|-------------------------------------------------|-----------------|-----------|--------------|-------------------------|---------------------------------|----------|
| 331.2638   | 4.31 | NA                                              | NA              | NA        | NA           | NA                      | increased in infected footpad   | 0.0079   |
| 368.2591   | 4.06 | acylcarnitine family member                     | NA              | NA        | NA           | NA                      | increased in infected footpad   | 0.0079   |
| 377.1461   | 2.41 | NA                                              | NA              | NA        | NA           | NA                      | increased in infected footpad   | 0.012    |
| 425.3375   | 3.18 | NA                                              | NA              | NA        | NA           | NA                      | increased in uninfected footpad | 0.0079   |
| 210.1121   | 2.74 | NA                                              | NA              | NA        | NA           | NA                      | increased in infected footpad   | 0.0079   |
| 212.1651   | 2.75 | NA                                              | NA              | NA        | NA           | NA                      | increased in uninfected footpad | 0.0079   |
| 206.1067   | 4.51 | NA                                              | NA              | NA        | NA           | NA                      | increased in infected footpad   | 0.0079   |
| 549.2233   | 2.49 | NA                                              | NA              | NA        | NA           | NA                      | increased in uninfected footpad | 0.0079   |
| 522.2834   | 4.16 | 1-(9Z-octadecenoyl)-sn-glycero-3-phosphocholine | 0               | 0         | 0.95         | 15                      | increased in infected footpad   | 0.0079   |
| 303.2323   | 4.1  | 5,6-epoy-8Z,11Z,14Z-eicosatrienoic acid         | 0               | 4         | 0.89         | 8                       | increased in infected footpad   | 0.0079   |
| 327.2325   | 4.05 | NA                                              |                 |           |              |                         | increased in infected footpad   | 0.0079   |
| 508.3764   | 4.01 | 1-(1Z-octadecenyl)-sn-glycero-3-phosphocholine  | 0               | 2         | 0.91         | 10                      | increased in infected footpad   | 0.0079   |

|          |      |    |    |    |    |    |                                       |        |
|----------|------|----|----|----|----|----|---------------------------------------|--------|
| 281.0052 | 2.55 | NA | NA | NA | NA | NA | increased in<br>infected footpad      | 0.0079 |
| 377.2661 | 4.32 | NA | NA | NA | NA | NA | increased in<br>infected footpad      | 0.0079 |
| 230.1756 | 2.74 | NA | NA | NA | NA | NA | increased in<br>uninfected<br>footpad | 0.0079 |

251 NA: not applicable



**Table 7. Most differential metabolite features (as identified by random forest analysis) for footpad organic extraction**

| <i>m/z</i> | RT   | Spectral match on GNPS / LIPID MAPS annotation                                 | Mass difference | PPM error | Cosine score | Number of matched peaks | Impact of infection             | P values |
|------------|------|--------------------------------------------------------------------------------|-----------------|-----------|--------------|-------------------------|---------------------------------|----------|
| 794.6035   | 5.97 | PC O-38:5 / PC 37:5                                                            | 0               | 2         | 0.81         | 7                       | increased in infected footpad   | 0.0079   |
| 768.5885   | 5.89 | PC family member                                                               | NA              | NA        | NA           | NA                      | increased in infected footpad   | 0.0079   |
| 703.5752   | 4.7  | PC family member                                                               | NA              | NA        | NA           | NA                      | increased in infected footpad   | 0.0079   |
| 720.5895   | 6.63 | PC(O-32:0)                                                                     | NA              | NA        | NA           | NA                      | increased in infected footpad   | 0.0079   |
| 796.6135   | 6.64 | 1-heptadecanoyl-2-(5Z,8Z,11Z,14Z-eicosatetraenoyl)-sn-glycero-3-phosphocholine | 0               | 3         | 0.8          | 6                       | increased in infected footpad   | 0.0079   |
| 828.5521   | 5.36 | PC(40:9)                                                                       | NA              | NA        | NA           | NA                      | increased in uninfected footpad | 0.0079   |
| 811.6686   | 6.55 | PC family member                                                               | NA              | NA        | NA           | NA                      | increased in infected footpad   | 0.0079   |
| 796.6182   | 6.59 | 1-heptadecanoyl-2-(5Z,8Z,11Z,14Z-eicosatetraenoyl)-sn-glycero-3-phosphocholine | 0               | 3         | 0.8          | 6                       | increased in infected footpad   | 0.00791  |
| 744.5891   | 6.01 | 1,2-di-(9Z-octadecenoyl)-sn-glycero-3-phosphoethanolamine                      | 0               | 4         | 0.76         | 13                      | increased in infected footpad   | 0.0079   |
| 352.2937   | 4.71 | NA                                                                             | NA              | NA        | NA           | NA                      | increased in infected footpad   | 0.0079   |
| 519.4891   | 3.79 | NA                                                                             | NA              | NA        | NA           | NA                      | increased in infected footpad   | 0.0079   |

|          |          |                                                   |    |    |      |    |                                 |        |
|----------|----------|---------------------------------------------------|----|----|------|----|---------------------------------|--------|
| 480.3097 | 2.8<br>1 | PC family member                                  | NA | NA | NA   | NA | increased in uninfected footpad | 0.0079 |
| 813.6867 | 7.5<br>1 | N-tetracosenoyl-4-sphingeny-1-O-phosphorylcholine | 0  | 4  | 0.91 | 6  | increased in infected footpad   | 0.0079 |
| 585.534  | 3.5<br>3 | NA                                                | NA | NA | NA   | NA | increased in infected footpad   | 0.016  |

252 NA: not applicable

## 253 Discussion

254 The metabolome provides a link between genotype and phenotype by identifying changes  
255 occurring at the molecular level, for example when parasites and their hosts interact [28].  
256 Metabolism is also an indicator of the host physiological state. Understanding the infection-  
257 induced host metabolic alterations could lead to new treatments for parasitic diseases [29],  
258 particularly host-targeted drug therapy focused on pathways otherwise redundant to the host but  
259 important for parasite invasion, replication and survival [30], or on mitigating damage caused by  
260 the parasite [29]. In addition, host metabolism, as measured in plasma samples, has been shown  
261 to be able to serve as an indicator of response to CL treatment [31]. Several studies have  
262 investigated *Leishmania* metabolism during *in vitro* macrophage infection (e.g. [32]), or in  
263 amastigotes purified from mouse granulomatous lesions [33], but there is still a lack of  
264 knowledge of host metabolic responses during *in vivo* infection. Given the relative host vs  
265 parasite biomass and the slow replication of *Leishmania* during *in vivo* infection [33], it is likely  
266 that most metabolites identified in our study were host-derived, thereby expanding our  
267 understanding of host metabolic contributions to CL pathogenesis.

268 Amongst annotatable metabolites in our study, members of the PC family were most  
269 affected by infection. PCs were detected in both infected and uninfected groups. PCs of the  
270 smaller  $m/z$  range ( $m/z$  200-799) were significantly higher with infection and those in the larger  
271  $m/z$  range ( $m/z$  800-899) showed the opposite trend, where PC levels were decreased by infection  
272 at the lesion site (Fig. 1E-J). Total PCs were significantly higher in the infected ear center vs the  
273 infected ear edge, uninfected ear center and uninfected ear edge (Fig. 1K). Select PCs were also  
274 increased in the infected footpad (Tables 6-7). Miltefosine is a commonly administered oral  
275 drug for the treatment of visceral and CL that targets the PC biosynthetic pathway [34].  
276 Importantly, miltefosine was originally developed for its anti-tumor properties against cancer,

277 and as such can be expected to also proceed via host-directed effects in addition to impacts on  
278 parasite metabolism. We speculate that miltefosine mechanism of action in CL may thus also  
279 involve re-normalization of infection-induced changes in host PCs. Future studies are thus  
280 needed to investigate the mechanism of action of miltefosine with respect to host metabolism in  
281 CL.

282 Additional annotatable metabolites also included the omega-3 fatty acid eicosatrienoic  
283 acid and glutamine. Glutamine was noted to be significantly lower with infection at the site of  
284 the ear lesion. A recent study in mice infected with *L. donovani* showed heightened glutamine  
285 consumption with infection and a role of glutamine supplementation in clearing parasite load  
286 [35]. Additionally, glutamine uptake is also essential to the pathogenesis of *Toxoplasmosis*  
287 *gondii* parasite infection [36]. Future studies should aim to look at the specific functional role of  
288 glutamine metabolism in *L. major* infection.

289 The clinical presentations of CL lesions can vary and are capable of self-healing in some  
290 cases. However, resolving these can take several months to years at a time, leaving behind a  
291 significant amount of scarring. In cases of Post-Kala Azar dermal leishmaniasis, patients can  
292 continue to serve as a reservoir for the parasites after the lesions have long been healed [37]. Our  
293 results showed significant perturbations in the metabolism of the skin lesions, with the area near  
294 the skin lesions also being affected in experimental CL. Our study relied on bioluminescence to  
295 measure parasite burden and as such we only have low spatial resolution and cannot ascertain  
296 whether parasites were still present at low levels in the sites adjacent to the skin lesions. There is  
297 therefore still a strong need to understand the role of lesion-free tissues in transmission of  
298 *Leishmania* and in disease pathogenesis.

299           This study looked at both ear and footpad infection models, although the effect of  
300 infection was found to be more minor in the footpad. This could be attributed to the limited  
301 sample size for the footpad sampling and a reduced magnitude of metabolic changes, making the  
302 study underpowered. Nevertheless, specific PC family metabolites were increased with infection  
303 in the footpad, drawing parallels to the ear data and showcasing similarities in pathogenesis  
304 processes between these two infection models.

305           While this untargeted metabolomics study enabled us to uncover several metabolic  
306 pathways affected in CL, on average unannotatable compounds (level 2 annotations according to  
307 metabolites standards initiative [38]) still represent 88.3% of our data. Molecular networking did  
308 enable us to extend annotations further, so that 61.7% of our top 15 most differential metabolite  
309 features identified by random forest had at least family-level (level 3) annotations [38].  
310 Nevertheless, metabolomics annotation rates are continuously improving. Our results have been  
311 deposited in a “living data” database [23], where they are continuously being re-annotated as  
312 reference libraries and computational tools expand. As such, they will continue to yield more  
313 insights into CL pathogenesis and serve as a building point for expanded studies of metabolism  
314 in CL. Such results will help guide the next generation of CL drug treatments.

315

## 316 **Acknowledgments**

317           Luciferase-expressing *L. major* parasites were provided by Dr. Martin Olivier, McGill  
318 University.

## 319 **Financial Disclosure Statement**

320 Data collection was supported by a postdoctoral fellowship from the Canadian Institutes  
321 of Health Research, award number 338511 to L-IM ([www.cihr-irsc.gc.ca/](http://www.cihr-irsc.gc.ca/)). Work in the McCall  
322 laboratory at the University of Oklahoma is supported by start-up funds from the University of  
323 Oklahoma (<http://www.ou.edu/>). This work was also partially supported by US National  
324 Institutes of Health (NIH) grant 5P41GM103484-07 to PCD ([www.nih.gov/](http://www.nih.gov/)). We further  
325 acknowledge NIH Grant GMS10RR029121 ([www.nih.gov/](http://www.nih.gov/)) and Bruker ([www.bruker.com/](http://www.bruker.com/)) for  
326 the shared instrumentation infrastructure that enabled this work (to PCD). The funders had no  
327 role in study design, data collection and analysis, decision to publish, or preparation of the  
328 manuscript.

## 329 **References**

- 330 1. Georgiadou SP, Makaritsis KP, Dalekos GN. Leishmaniasis revisited: Current aspects on  
331 epidemiology, diagnosis and treatment. *J Transl Int Med.* 2015;3: 43–50.
- 332 2. Alvar J, Yactayo S, Bern C. Leishmaniasis and poverty. *Trends in Parasitology.* 2006. pp.  
333 552–557. doi:10.1016/j.pt.2006.09.004
- 334 3. Bern C, Maguire JH, Alvar J. Complexities of assessing the disease burden attributable to  
335 leishmaniasis. *PLoS Negl Trop Dis.* 2008;2: e313.
- 336 4. Leishmaniasis. In: World Health Organization [Internet]. [cited 20 Jan 2020]. Available:  
337 [https://www.who.int/leishmaniasis/disease/clinical\\_forms\\_leishmaniases/en/](https://www.who.int/leishmaniasis/disease/clinical_forms_leishmaniases/en/)
- 338 5. McCall L-I, Zhang W-W, Matlashewski G. Determinants for the Development of Visceral  
339 Leishmaniasis Disease. *PLoS Pathog.* 2013;9: e1003053.

- 340 6. McCall L-I, McKerrow JH. Determinants of disease phenotype in trypanosomatid parasites.  
341 Trends Parasitol. 2014;30: 342–349.
- 342 7. Parasites-Leishmaniasis. In: Centers for Disease Control and Prevention [Internet]. [cited 20  
343 Jan 2020]. Available: <https://www.cdc.gov/parasites/leishmaniasis/biology.html>
- 344 8. Ponte-Sucre A, Gamarro F, Dujardin J-C, Barrett MP, López-Vélez R, García-Hernández R,  
345 et al. Drug resistance and treatment failure in leishmaniasis: A 21st century challenge. PLoS  
346 Negl Trop Dis. 2017;11: e0006052.
- 347 9. Bueno-Marí R, Jiménez-Peydró R. Global change and human vulnerability to vector-borne  
348 diseases. Front Physiol. 2013;4: 158.
- 349 10. Deidda M, Piras C, Bassareo PP, Dessalvi CC, Mercurio G. Metabolomics, a promising  
350 approach to translational research in cardiology. IJC Metabolic & Endocrine. 2015. pp. 31–  
351 38. doi:10.1016/j.ijcme.2015.10.001
- 352 11. Vinayavekhin N, Saghatelian A. Untargeted Metabolomics. Current Protocols in Molecular  
353 Biology. 2010. doi:10.1002/0471142727.mb3001s90
- 354 12. Vincent IM, Weidt S, Rivas L, Burgess K, Smith TK, Ouellette M. Untargeted metabolomic  
355 analysis of miltefosine action in *Leishmania infantum* reveals changes to the internal lipid  
356 metabolism. Int J Parasitol Drugs Drug Resist. 2014;4: 20–27.
- 357 13. Roy G, Dumas C, Sereno D, Wu Y, Singh AK, Tremblay MJ, et al. Episomal and stable  
358 expression of the luciferase reporter gene for quantifying *Leishmania* spp. infections in  
359 macrophages and in animal models. Mol Biochem Parasitol. 2000;110: 195–206.

- 360 14. McCall L-I, El Aroussi A, Choi JY, Vieira DF, De Muylder G, Johnston JB, et al. Targeting  
361 Ergosterol Biosynthesis in *Leishmania donovani*: Essentiality of Sterol 14 $\alpha$ -  
362 demethylase. *PLOS Neglected Tropical Diseases*. 2015. p. e0003588.  
363 doi:10.1371/journal.pntd.0003588
- 364 15. McCall L-I, Morton JT, Bernatchez JA, de Siqueira-Neto JL, Knight R, Dorrestein PC, et  
365 al. Mass Spectrometry-Based Chemical Cartography of a Cardiac Parasitic Infection. *Anal*  
366 *Chem*. 2017;89: 10414–10421.
- 367 16. Pluskal T, Castillo S, Villar-Briones A, Orešič M. MZmine 2: Modular framework for  
368 processing, visualizing, and analyzing mass spectrometry-based molecular profile data.  
369 *BMC Bioinformatics*. 2010. doi:10.1186/1471-2105-11-395
- 370 17. Perez F, Granger BE. IPython: A System for Interactive Scientific Computing. *Computing*  
371 *in Science & Engineering*. 2007. pp. 21–29. doi:10.1109/mcse.2007.53
- 372 18. Caporaso JG, Kuczynski J, Stombaugh J, Bittinger K, Bushman FD, Costello EK, et al.  
373 QIIME allows analysis of high-throughput community sequencing data. *Nat Methods*.  
374 2010;7: 335–336.
- 375 19. Bray JR, Roger Bray J, Curtis JT. An Ordination of the Upland Forest Communities of  
376 Southern Wisconsin. *Ecological Monographs*. 1957. pp. 325–349. doi:10.2307/1942268
- 377 20. Faith DP, Minchin PR, Belbin L. Compositional dissimilarity as a robust measure of  
378 ecological distance. *Theory and models in vegetation science*. 1987. pp. 57–68.  
379 doi:10.1007/978-94-009-4061-1\_6



- 380 21. Vázquez-Baeza Y, Pirrung M, Gonzalez A, Knight R. EMPeror: a tool for visualizing high-  
381 throughput microbial community data. *Gigascience*. 2013;2: 16.
- 382 22. Breiman L. Random Forests. *Mach Learn*. 2001;45: 5–32.
- 383 23. Wang M, Carver JJ, Phelan VV, Sanchez LM, Garg N, Peng Y, et al. Sharing and  
384 community curation of mass spectrometry data with Global Natural Products Social  
385 Molecular Networking. *Nat Biotechnol*. 2016;34: 828–837.
- 386 24. Phelan VV. Feature-Based Molecular Networking for Metabolite Annotation.  
387 *Computational Methods and Data Analysis for Metabolomics*. 2020. pp. 227–243.  
388 doi:10.1007/978-1-0716-0239-3\_13
- 389 25. Nothias Louis Felix. Feature-based Molecular Networking in the GNPS Analysis  
390 Environment. *BioRxiv*. 2019. doi:10.1101/812404
- 391 26. Shannon P, Markiel A, Ozier O, Baliga NS, Wang JT, Ramage D, et al. Cytoscape: a  
392 software environment for integrated models of biomolecular interaction networks. *Genome*  
393 *Res*. 2003;13: 2498–2504.
- 394 27. Chambers JM. *Graphical methods for data analysis*. Wadsworth International Group; 1983.
- 395 28. Newsom SN, McCall L-I. Metabolomics: Eavesdropping on silent conversations between  
396 hosts and their unwelcome guests. *PLoS Pathog*. 2018;14: e1006926.
- 397 29. Hossain E, Khanam S, Wu C, Lostracco-Johnson S, Thomas D, Katemauswa M, et al. 3D  
398 mapping of host-parasite-microbiome interactions reveals metabolic determinants of tissue  
399 tropism and disease tolerance in Chagas disease. doi:10.1101/727917

- 400 30. Varikuti S, Jha BK, Volpedo G, Ryan NM, Halsey G, Hamza OM, et al. Host-Directed  
401 Drug Therapies for Neglected Tropical Diseases Caused by Protozoan Parasites. *Front*  
402 *Microbiol.* 2018;9: 2655.
- 403 31. Vargas DA, Prieto MD, Martínez-Valencia AJ, Cossio A, Burgess KEV, Burchmore RJS, et  
404 al. Pharmacometabolomics of Meglumine Antimoniate in Patients With Cutaneous  
405 Leishmaniasis. *Front Pharmacol.* 2019;10. doi:10.3389/fphar.2019.00657
- 406 32. Saunders EC, Ng WW, Kloehn J, Chambers JM, Ng M, McConville MJ. Induction of a  
407 Stringent Metabolic Response in Intracellular Stages of *Leishmania mexicana* Leads to  
408 Increased Dependence on Mitochondrial Metabolism. *PLoS Pathog.* 2014;10: e1003888.
- 409 33. Kloehn J, Saunders EC, O’Callaghan S, Dagley MJ, McConville MJ. Characterization of  
410 metabolically quiescent *Leishmania* parasites in murine lesions using heavy water labeling.  
411 *PLoS Pathog.* 2015;11: e1004683.
- 412 34. Rakotomanga M, Blanc S, Gaudin K, Chaminade P, Loiseau PM. Miltefosine affects lipid  
413 metabolism in *Leishmania donovani* promastigotes. *Antimicrob Agents Chemother.*  
414 2007;51: 1425–1430.
- 415 35. Ferreira C, Mesquita I, Barbosa AM, Osório NS, Torrado E, Beauparlant C-J, et al.  
416 Glutamine supplementation improves the efficacy of miltefosine treatment for visceral  
417 leishmaniasis. *PLoS Negl Trop Dis.* 2020;14: e0008125.
- 418 36. Lee I-P, Evans AK, Yang C, Works MG, Kumar V, De Miguel Z, et al. *Toxoplasma gondii*  
419 is dependent on glutamine and alters migratory profile of infected host bone marrow  
420 derived immune cells through SNAT2 and CXCR4 pathways. *PLoS One.* 2014;9: e109803.

- 421 37. Scorza BM, Carvalho EM, Wilson ME. Cutaneous Manifestations of Human and Murine  
422 Leishmaniasis. *Int J Mol Sci.* 2017;18. doi:10.3390/ijms18061296
- 423 38. Sumner LW, Amberg A, Barrett D, Beale MH, Beger R, Daykin CA, et al. Proposed  
424 minimum reporting standards for chemical analysis Chemical Analysis Working Group  
425 (CAWG) Metabolomics Standards Initiative (MSI). *Metabolomics.* 2007;3: 211–221.
